# Supplementary material
Source: Royal Society of Chemistry journal article supplement (doi:10.1039/d5tb02937f)
Supplement: d5tb02937f1.pdf [file d5tb02937f1.pdf]

# **A Self-Healing Injectable PF127-Gelatin Bioadhesive Sealant with Antioxidant and Antibacterial Activities for Accelerated Oral Ulcer Repair**

Jinghan Wang,<sup>†,a,b</sup> Gang He,<sup>†,c</sup> Jinying Zhao,<sup>c</sup> Min Chen,<sup>c</sup> Zheng Pan,<sup>c</sup> Chong  
Zhang,<sup>\*,c</sup> Decheng Wu<sup>\*,c</sup>, Wen Sui<sup>\*,a</sup>

<sup>a</sup>College of Pharmacy, College of Stomatology, Shenzhen Technology University,  
Shenzhen, Guangdong, 518118, China

<sup>b</sup>School of Pharmacy, Shenzhen University Medical School, Shenzhen University,  
Shenzhen, Guangdong, 518055, China

<sup>c</sup>Guangdong Provincial Key Laboratory of Advanced Biomaterials, Department of  
Biomedical Engineering, Southern University of Science and Technology, No. 1088  
Xueyuan Avenue, Nanshan District Shenzhen, Guangdong 518055, China.

Email: zhangc9@sustech.edu.cn; wudc@sustech.edu.cn; suiwen@sztu.edu.cn

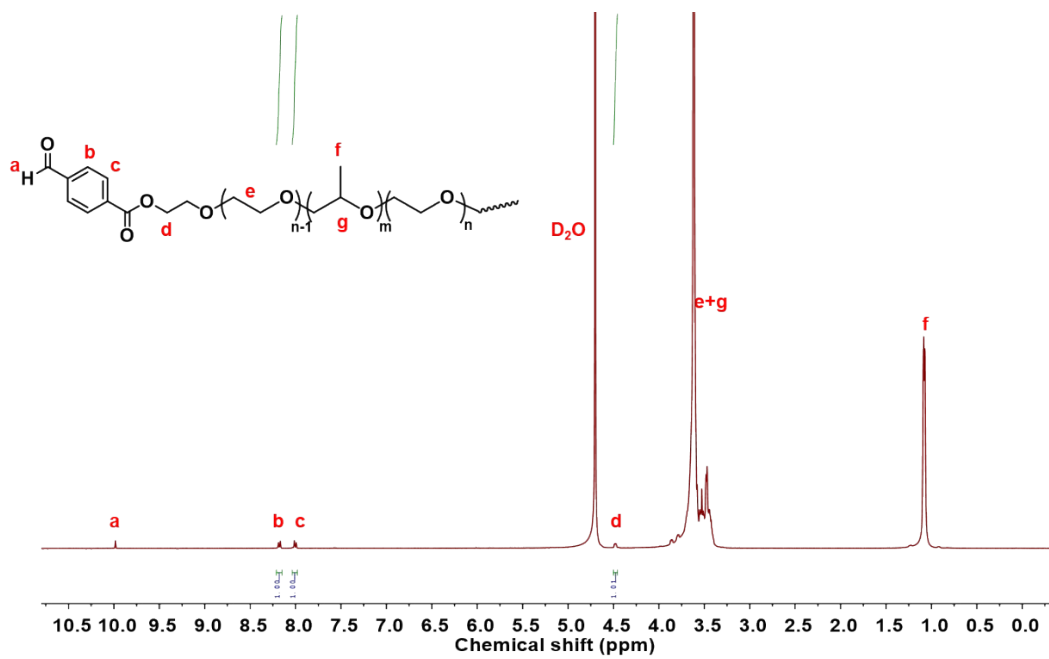

**Fig. S1** <sup>1</sup>H NMR spectrum of the PF127-CHO.

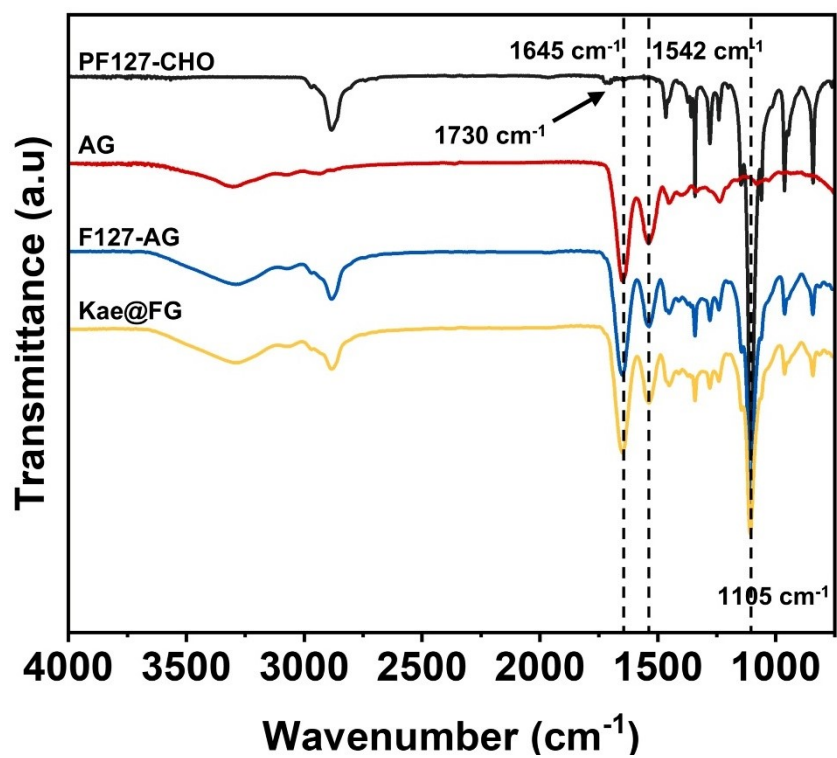

**Fig. S2** FT-IR spectra of PF127-CHO, amino gelatin (AG), 20% (w/v) F127-AG hydrogel, and Kae@FG hydrogel.

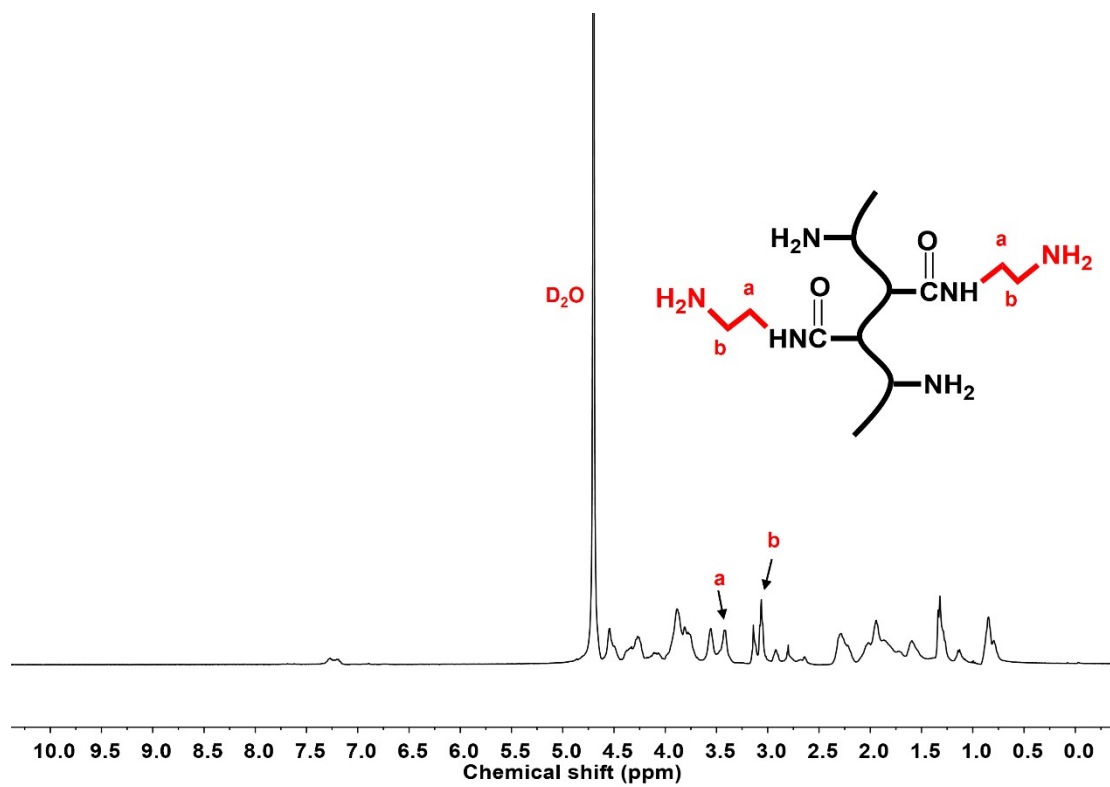

Fig. S3 <sup>1</sup>H NMR spectrum of the amino gelatin (AG)

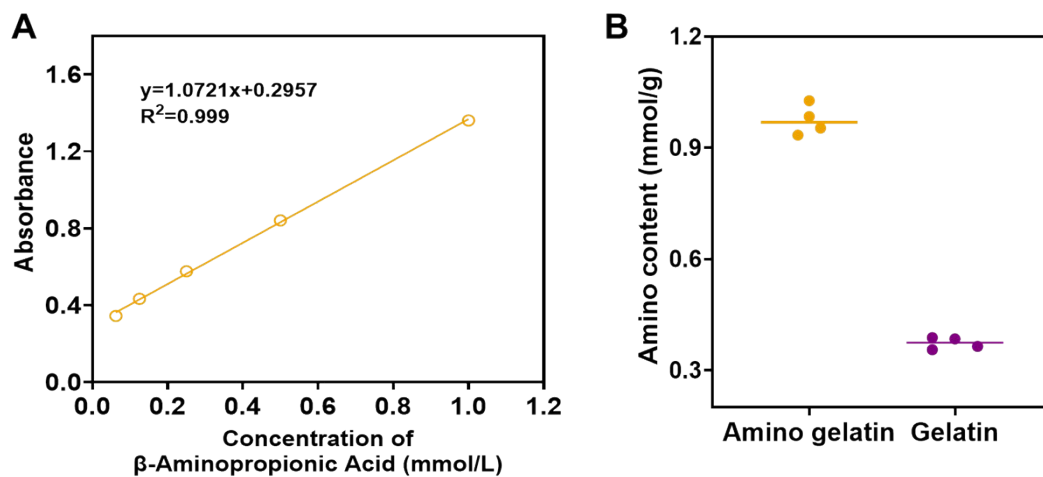

**Fig. S4** Determination of free amino groups using the TNBS method. (A) Standard curve of  $\beta$ -aminopropionic acid. (B) Quantification of amino group content in unmodified gelatin and amino gelatin (AG) based on TNBS assay (n = 4).

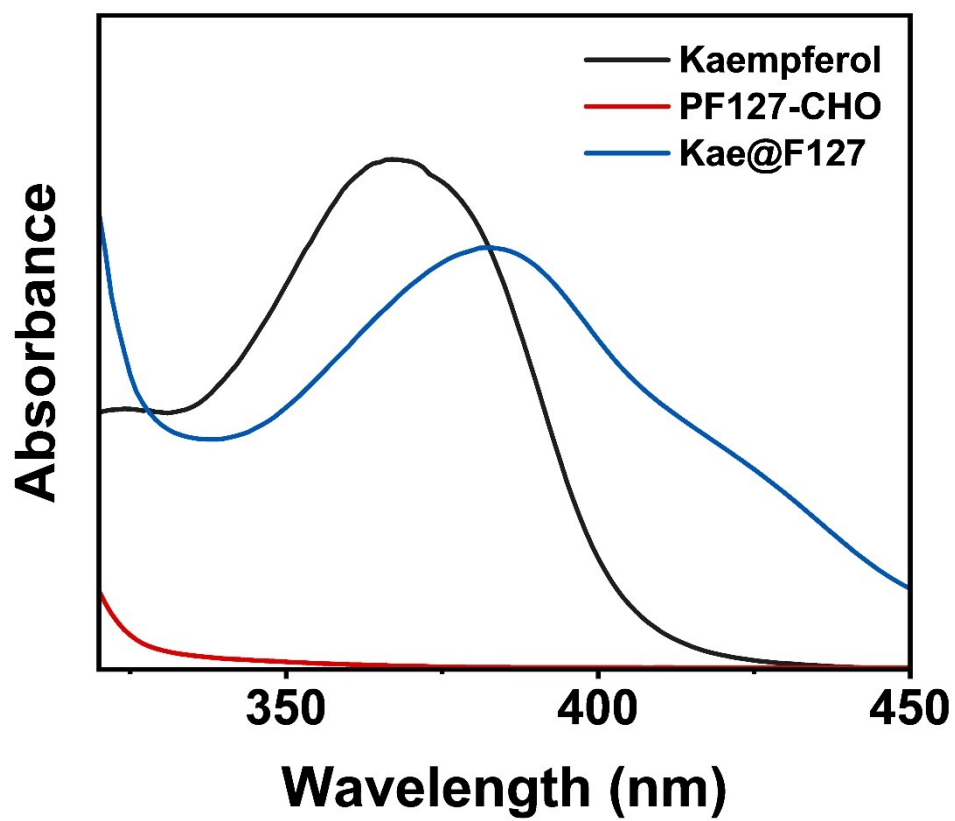

**Fig. S5** UV-Vis absorption spectra of kaempferol, PF127-CHO, and Kae-loaded F127 (Kae@F127) solutions.

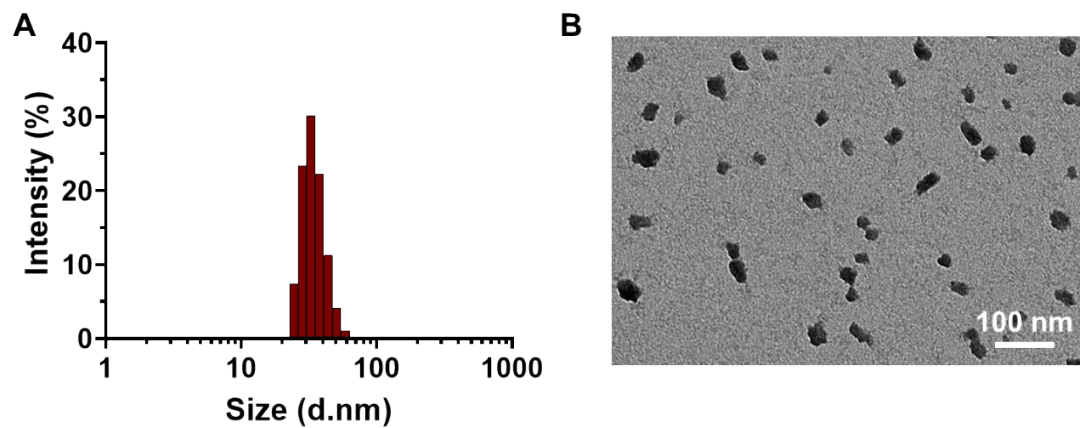

**Fig. S6** (A) Particle size distribution of Kae@F127-CHO micelles and (B) representative TEM image of Kae@F127-CHO micelles (scale bar: 100 nm).

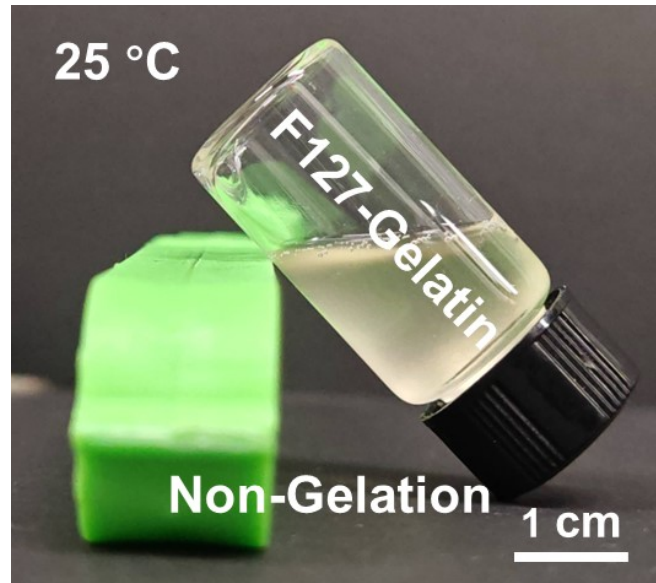

**Fig. S7** Photograph of the mixture of equal volumes of unmodified gelatin and PF127-CHO, each at 20% (w/v), showing no gel formation (scale bar: 1 cm).

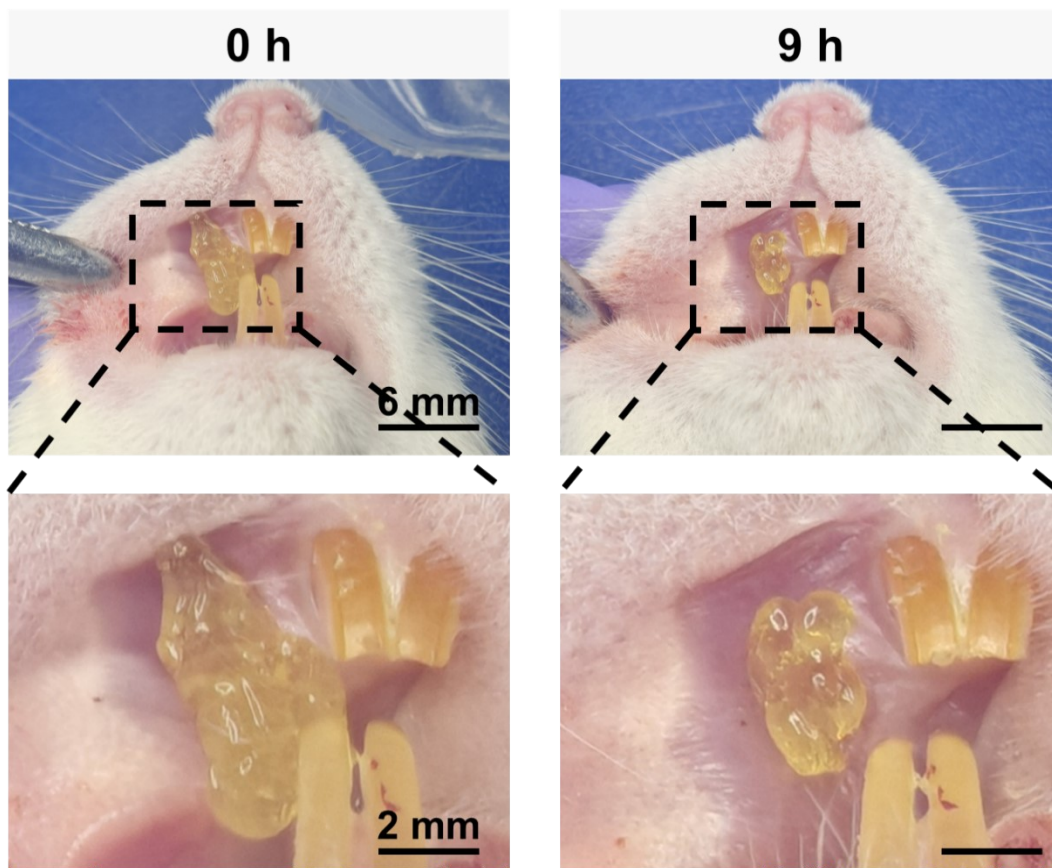

**Fig. S8** Representative in vivo photographs showing the retention of Kae@FG hydrogel on the oral mucosa of SD rats (scale bar: 6 mm). High-magnification views of the indicated regions are also shown (scale bar: 2 mm).

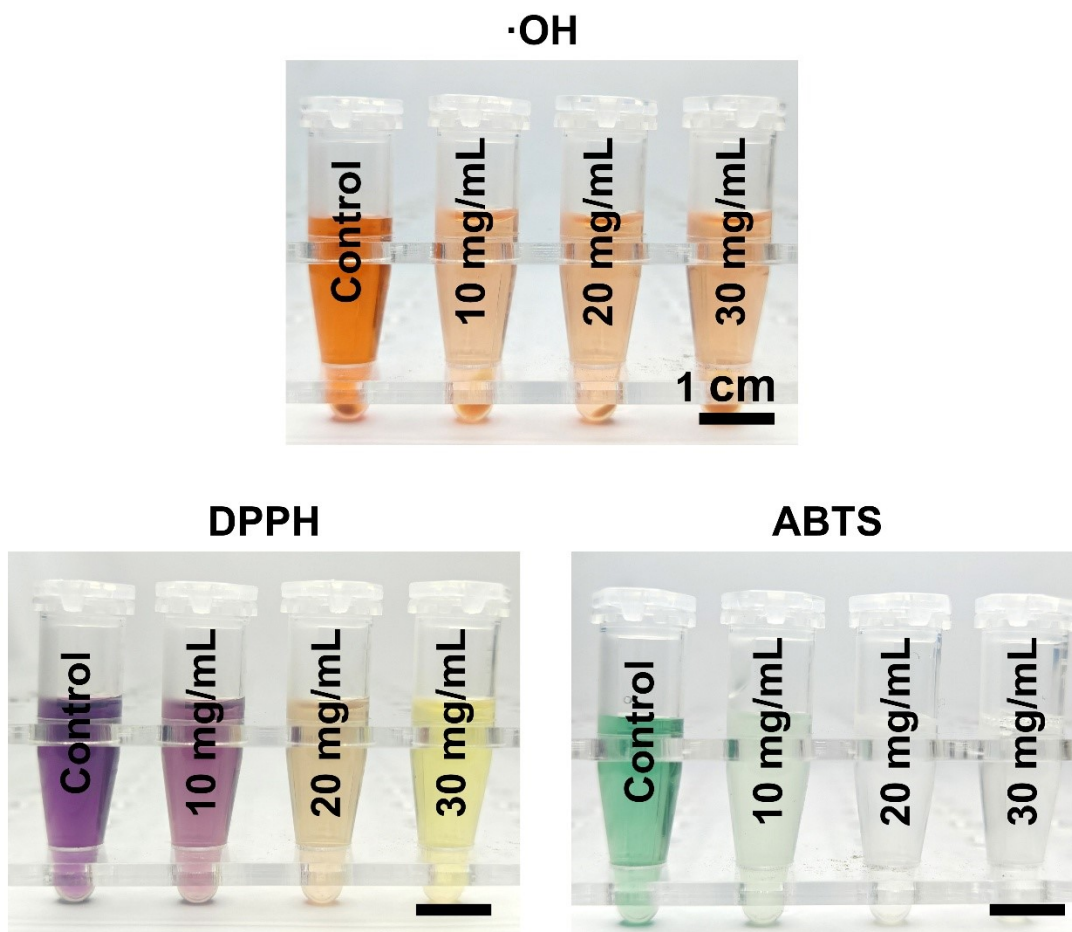

**Fig. S9** Photographs showing color changes of  $\cdot\text{OH}$ , DPPH, and ABTS solutions after co-incubation with hydrogels at different concentrations (scale bar: 1 cm).

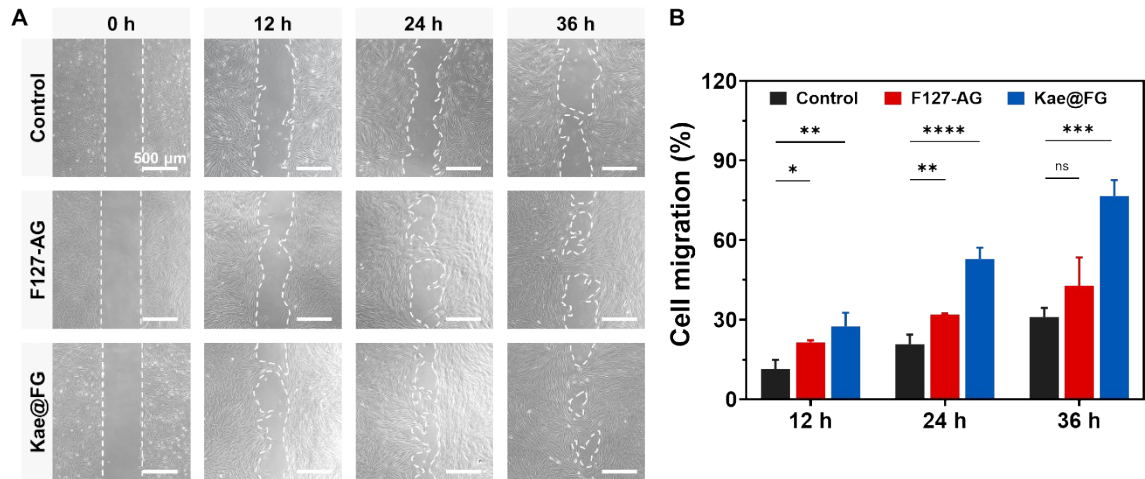

**Fig. S10** Representative images (A) and quantitative analysis (B) of HGF cell migration under oxidative stress following treatment with hydrogel extracts from F127-AG and Kae@FG (scale bar: 500  $\mu\text{m}$ ,  $n = 3$ ). Data are presented as mean  $\pm$  S.D. Statistical analysis in (B) was performed by one-way ANOVA with Dunnett's multiple comparisons test ( $*p < 0.05$ ,  $**p < 0.01$ ,  $***p < 0.001$ ,  $****p < 0.0001$ ,  $ns =$  not significant).

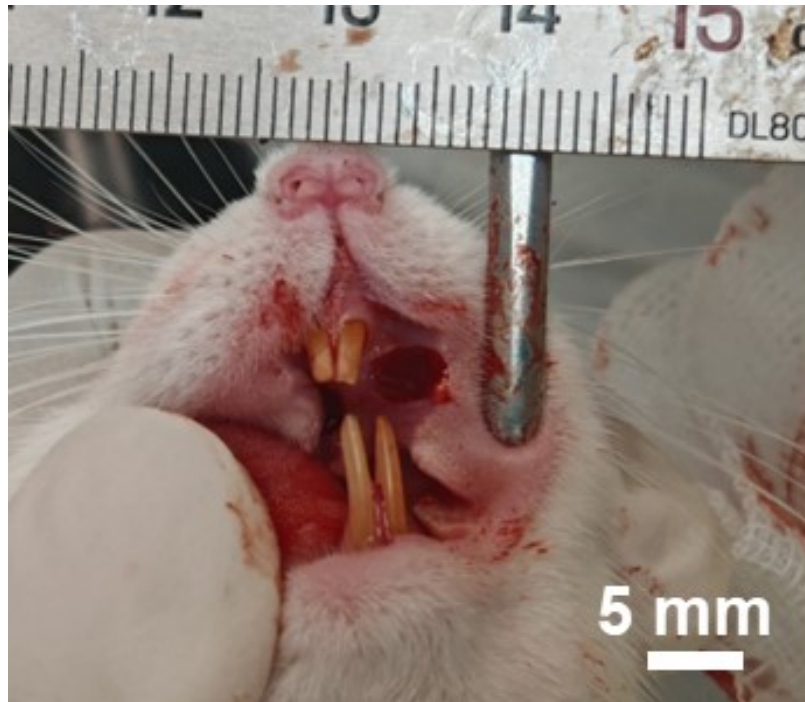

**Fig. S11** Representative photograph showing the establishment of the rat oral ulcer model (scale bar: 5 mm).

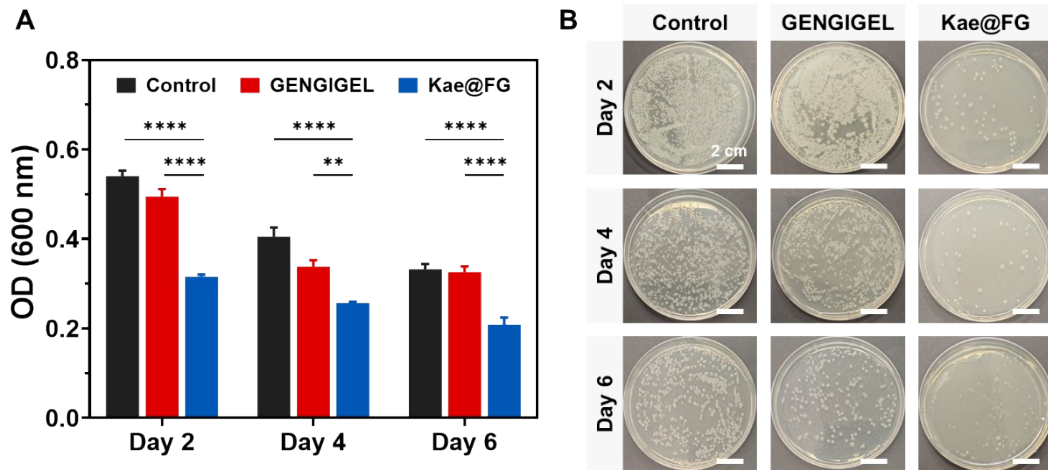

**Fig. S12** The OD600 values of bacterial suspension (A) and bacterial colonies from different groups on days 2, 4 and 6 (B) (scale bar: 2 cm, n = 3). Data are presented as mean  $\pm$  S.D. Statistical analysis in (A) was performed by one-way ANOVA with Dunnett's multiple comparisons test (\*\* $p < 0.01$ , \*\*\*\* $p < 0.0001$ ).

**Table S1** List of primary and secondary antibodies used in this study

| Primary Antibody | Catalog Number | Manufacturer | Species | Primary Antibody Dilution | Secondary Antibody                  | Secondary Antibody Dilution |
|------------------|----------------|--------------|---------|---------------------------|-------------------------------------|-----------------------------|
| TNF- $\alpha$    | GB11188        | Servicebio   | Rabbit  | 1:500                     | HRP-conjugated Goat Anti-Rabbit IgG | 1:500                       |
| MPO              | GB11224        | Servicebio   | Rabbit  | 1:1000                    | HRP-conjugated Goat Anti-Rabbit IgG | 1:500                       |
| CD31             | GB11315<br>1   | Servicebio   | Rabbit  | 1:500                     | HRP-conjugated Goat Anti-Rabbit IgG | 1:500                       |
| iNOS             | GB11119        | Servicebio   | Rabbit  | 1:500                     | HRP-conjugated Goat Anti-Rabbit IgG | 1:500                       |
| CD206            | GB11349<br>7   | Servicebio   | Rabbit  | 1:500                     | HRP-conjugated Goat Anti-Rabbit IgG | 1:500                       |
| HO-1             | GB11571<br>3   | Servicebio   | Rabbit  | 1:500                     | HRP-conjugated Goat Anti-Rabbit IgG | 1:500                       |
